# Supplementary material
Source: publisher site journal article supplement (https://www.dovepress.com/get_supplementary_file.php?f=385220.docx)
Supplement: Supplementary file 1 [file get_supplementary_file.php]

| STable 1. Test of Homogeneity of Variances of AISI | | |
| --- | --- | --- |
| Variables | Levene statistic | *P*-value |
| Age (year) | 0.461 | 0.710 |
| BMI (kg/m2) | 0.073 | 0.975 |
| FSH (IU/L) | 0.900 | 0.441 |
| LH (IU/L) | 0.947 | 0.418 |
| E2 (pmol/L) | 3.772 | 0.011 |
| Total T (nmol/L) | 1.145 | 0.330 |
| TSH (IU/L) | 0.444 | 0.722 |
| WBC (109/L) | 9.612 | <0.001 |
| CRP (mg/L) | 1.332 | 0.263 |
| Triglycerides (mmol/L) | 1.121 | 0.340 |
| HDL (mmol/L) | 1.667 | 0.173 |
| LDL (mmol/L) | 1.465 | 0.223 |
| HCY (mmol/L) | 0.914 | 0.434 |
| Fasting glucose (mmol/L) | 2.773 | 0.041 |
| Fasting insulin (pmol/L) | 5.418 | 0.001 |
| HOMA-IR | 5.706 | 0.001 |
| The femoral neck BMD (g/cm2) | 0.807 | 0.490 |
|  |  |  |
| STable 2. Test of Homogeneity of Variances of NLPR | | |
| Variables | Levene statistic | *P*-value |
| Age (year) | 1.212 | 0.305 |
| BMI (kg/m2) | 0.104 | 0.958 |
| FSH (IU/L) | 1.307 | 0.271 |
| LH (IU/L) | 1.903 | 0.128 |
| E2 (pmol/L) | 4.683 | 0.003 |
| Total T (nmol/L) | 2.035 | 0.108 |
| TSH (IU/L) | 0.667 | 0.573 |
| WBC (109/L) | 4.143 | 0.006 |
| CRP (mg/L) | 0.028 | 0.994 |
| Triglycerides (mmol/L) | 0.514 | 0.673 |
| HDL (mmol/L) | 0.161 | 0.922 |
| LDL (mmol/L) | 1.284 | 0.279 |
| HCY (mmol/L) | 0.285 | 0.836 |
| Fasting glucose (mmol/L) | 0.668 | 0.572 |
| Fasting insulin (pmol/L) | 1.114 | 0.343 |
| HOMA-IR | 1.269 | 0.284 |
| The femoral neck BMD (g/cm2) | 0.899 | 0.441 |
|  |  |  |
| STable 3. Test of Homogeneity of Variances of SII | | |
| Variables | Levene statistic | *P*-value |
| Age (year) | 0.386 | 0.763 |
| BMI (kg/m2) | 1.147 | 0.330 |
| FSH (IU/L) | 0.765 | 0.514 |
| LH (IU/L) | 1.650 | 0.177 |
| E2 (pmol/L) | 2.095 | 0.100 |
| Total T (nmol/L) | 1.473 | 0.221 |
| TSH (IU/L) | 0.686 | 0.561 |
| WBC (109/L) | 5.997 | 0.001 |
| CRP (mg/L) | 2.719 | 0.044 |
| Triglycerides (mmol/L) | 1.874 | 0.133 |
| HDL (mmol/L) | 0.420 | 0.739 |
| LDL (mmol/L) | 0.476 | 0.699 |
| HCY (mmol/L) | 3.806 | 0.010 |
| Fasting glucose (mmol/L) | 1.444 | 0.229 |
| Fasting insulin (pmol/L) | 4.216 | 0.006 |
| HOMA-IR | 5.555 | 0.001 |
| The femoral neck BMD (g/cm2) | 2.078 | 0.102 |
|  |  |  |
| STable 4. Test of Homogeneity of Variances of SIRI | | |
| Variables | Levene statistic | *P*-value |
| Age (year) | 1.384 | 0.247 |
| BMI (kg/m2) | 0.281 | 0.839 |
| FSH (IU/L) | 2.020 | 0.110 |
| LH (IU/L) | 2.939 | 0.033 |
| E2 (pmol/L) | 6.114 | <0.001 |
| Total T (nmol/L) | 2.374 | 0.069 |
| TSH (IU/L) | 0.661 | 0.576 |
| WBC (109/L) | 10.894 | <0.001 |
| CRP (mg/L) | 0.832 | 0.476 |
| Triglycerides (mmol/L) | 0.966 | 0.408 |
| HDL (mmol/L) | 0.136 | 0.938 |
| LDL (mmol/L) | 2.118 | 0.097 |
| HCY (mmol/L) | 2.229 | 0.084 |
| Fasting glucose (mmol/L) | 3.890 | 0.009 |
| Fasting insulin (pmol/L) | 2.908 | 0.034 |
| HOMA-IR | 2.994 | 0.030 |
| The femoral neck BMD (g/cm2) | 1.412 | 0.238 |
| *P*-value>0.05, ANOVA test has met, if not , K-W *H* test has used to test the difference between groups. | | |

| STable 5. Multiple Comparisons of Variables in Inflammation Indexes | | | |
| --- | --- | --- | --- |
| Inflammation Indexes | Variables | Group1 V Group2 | *P*-value |
| AISI | E2 (pmol/L) | 1 V 2 | 0.303 |
|  |  | 1 V 3 | 0.074 |
|  |  | 1 V 4 | 0.328 |
|  |  | 2 V 3 | 0.005* |
|  |  | 2 V 4 | 0.045 |
|  |  | 3 V 4 | 0.419 |
|  | WBC (109/L) | 1 V 2 | 0.004* |
|  |  | 1 V 3 | <0.001* |
|  |  | 1 V 4 | <0.001* |
|  |  | 2 V 3 | <0.001* |
|  |  | 2 V 4 | <0.001* |
|  |  | 3 V 4 | <0.001* |
|  | CRP (mg/L) | 1 V 2 | 0.375 |
|  |  | 1 V 3 | 0.026 |
|  |  | 1 V 4 | 0.006* |
|  |  | 2 V 3 | 0.180 |
|  |  | 2 V 4 | 0.061 |
|  |  | 3 V 4 | 0.590 |
|  | Triglycerides (mmol/L) | 1 V 2 | 0.015 |
|  |  | 1 V 3 | 0.005* |
|  |  | 1 V 4 | 0.002* |
|  |  | 2 V 3 | 0.733 |
|  |  | 2 V 4 | 0.497 |
|  |  | 3 V 4 | 0.735 |
|  | Fasting insulin (pmol/L) | 1 V 2 | 0.072 |
|  |  | 1 V 3 | <0.001* |
|  |  | 1 V 4 | <0.001* |
|  |  | 2 V 3 | 0.009 |
|  |  | 2 V 4 | 0.066 |
|  |  | 3 V 4 | 0.429 |
|  | HOMA-IR | 1 V 2 | 0.064 |
|  |  | 1 V 3 | <0.001* |
|  |  | 1 V 4 | <0.001* |
|  |  | 2 V 3 | 0.009 |
|  |  | 2 V 4 | 0.045 |
|  |  | 3 V 4 | 0.551 |
|  | The femoral neck BMD (g/cm2) | 1 V 2 | 0.346 |
|  |  | 1 V 3 | 0.238 |
|  |  | 1 V 4 | 0.002* |
|  |  | 2 V 3 | 0.814 |
|  |  | 2 V 4 | 0.035 |
|  |  | 3 V 4 | 0.061 |
| NLPR | BMI (kg/m2) | 1 V 2 | 0.113 |
|  |  | 1 V 3 | 0.024 |
|  |  | 1 V 4 | <0.001* |
|  |  | 2 V 3 | 0.496 |
|  |  | 2 V 4 | 0.053 |
|  |  | 3 V 4 | 0.209 |
|  | LDL (mmol/L) | 1 V 2 | 0.690 |
|  |  | 1 V 3 | 0.103 |
|  |  | 1 V 4 | 0.005* |
|  |  | 2 V 3 | 0.218 |
|  |  | 2 V 4 | 0.016 |
|  |  | 3 V 4 | 0.240 |
|  | The femoral neck BMD (g/cm2) | 1 V 2 | 0.690 |
|  |  | 1 V 3 | 0.653 |
|  |  | 1 V 4 | 0.027 |
|  |  | 2 V 3 | 0.396 |
|  |  | 2 V 4 | 0.009 |
|  |  | 3 V 4 | 0.077 |
| SII | WBC (109/L) | 1 V 2 | <0.001* |
|  |  | 1 V 3 | <0.001* |
|  |  | 1 V 4 | <0.001* |
|  |  | 2 V 3 | 0.362 |
|  |  | 2 V 4 | <0.001* |
|  |  | 3 V 4 | <0.001* |
|  | CRP (mg/L) | 1 V 2 | 0.022 |
|  |  | 1 V 3 | 0.005* |
|  |  | 1 V 4 | <0.001* |
|  |  | 2 V 3 | 0.589 |
|  |  | 2 V 4 | 0.070 |
|  |  | 3 V 4 | 0.202 |
|  | Fasting glucose (mmol/L) | 1 V 2 | 0.214 |
|  |  | 1 V 3 | 0.013 |
|  |  | 1 V 4 | 0.001* |
|  |  | 2 V 3 | 0.213 |
|  |  | 2 V 4 | 0.031 |
|  |  | 3 V 4 | 0.356 |
|  | Fasting insulin (pmol/L) | 1 V 2 | 0.473 |
|  |  | 1 V 3 | 0.004* |
|  |  | 1 V 4 | 0.003* |
|  |  | 2 V 3 | 0.030 |
|  |  | 2 V 4 | 0.024 |
|  |  | 3 V 4 | 0.923 |
|  | HOMA-IR | 1 V 2 | 0.264 |
|  |  | 1 V 3 | 0.001* |
|  |  | 1 V 4 | 0.001* |
|  |  | 2 V 3 | 0.031 |
|  |  | 2 V 4 | 0.020 |
|  |  | 3 V 4 | 0.858 |
|  | The femoral neck BMD (g/cm2) | 1 V 2 | 0.051 |
|  |  | 1 V 3 | 0.008* |
|  |  | 1 V 4 | <0.001* |
|  |  | 2 V 3 | 0.470 |
|  |  | 2 V 4 | 0.018 |
|  |  | 3 V 4 | 0.101 |
| SIRI | WBC (109/L) | 1 V 2 | <0.001* |
|  |  | 1 V 3 | <0.001* |
|  |  | 1 V 4 | <0.001* |
|  |  | 2 V 3 | 0.001* |
|  |  | 2 V 4 | <0.001* |
|  |  | 3 V 4 | <0.001* |
|  | Triglycerides (mmol/L) | 1 V 2 | 0.017 |
|  |  | 1 V 3 | 0.018 |
|  |  | 1 V 4 | 0.006* |
|  |  | 2 V 3 | 0.978 |
|  |  | 2 V 4 | 0.676 |
|  |  | 3 V 4 | 0.654 |
|  | Fasting insulin (pmol/L) | 1 V 2 | 0.047 |
|  |  | 1 V 3 | <0.001* |
|  |  | 1 V 4 | 0.005* |
|  |  | 2 V 3 | 0.024 |
|  |  | 2 V 4 | 0.389 |
|  |  | 3 V 4 | 0.177 |
|  | HOMA-IR | 1 V 2 | 0.077 |
|  |  | 1 V 3 | <0.001* |
|  |  | 1 V 4 | 0.006* |
|  |  | 2 V 3 | 0.039 |
|  |  | 2 V 4 | 0.308 |
|  |  | 3 V 4 | 0.313 |
|  | The femoral neck BMD (g/cm2) | 1 V 2 | 0.362 |
|  |  | 1 V 3 | 0.703 |
|  |  | 1 V 4 | 0.001* |
|  |  | 2 V 3 | 0.194 |
|  |  | 2 V 4 | 0.012 |
|  |  | 3 V 4 | <0.001* |
| *The mean difference is significant at the 0.0083 level. | | | |
